# Supplementary material for: Effects of carbonate on ferrihydrite transformation in alkaline media
Source: Royal Society of Chemistry journal article supplement (doi:10.1039/d3em00469d), 2024-01-01
Supplement: d3em00469d1.pdf [file d3em00469d1.pdf]

1 **Effects of carbonate on the ferrihydrite transformation in alkaline media**

2

3 Ying Li,<sup>\*ab</sup> Chaoqun Zhang,<sup>c</sup> Meijun Yang,<sup>c</sup> Jing Liu,<sup>d</sup> Hongping He,<sup>c</sup> Yibing Ma<sup>a</sup> and Yuji

4 Arai<sup>b</sup>

5

6 *<sup>a</sup> National Observation and Research Station of Coastal Ecological Environments in Macao;*

7 *Macao Environmental Research Institute, Faculty of Innovation Engineering, Macau*

8 *University of Science and Technology, Macao SAR 999078, China*

9 *<sup>b</sup> Department of Natural Resources and Environmental Sciences, University of Illinois at*

10 *Urbana-Champaign, Urbana, IL 61801, USA*

11 *<sup>c</sup> CAS Key Laboratory of Mineralogy and Metallogeny/Guangdong Provincial Key Laboratory*

12 *of Mineral Physics and Materials, Guangzhou Institute of Geochemistry, Chinese Academy of*

13 *Sciences, Guangzhou 510640, China*

14 *<sup>d</sup> State Key Laboratory of Lunar and Planetary Sciences, Macau University of Science and*

15 *Technology, Taipa 999078, Macau*

16 *\* Corresponding author*

17 *Email address: liying@must.edu.mo*

18 **Table S1.** Linear combination fitting (LCF) of Fe K-edge extended X-ray absorption fine  
 19 structure (EXAFS) spectra of ferrihydrite as a function of aging time at different carbonate or  
 20 nitrate concentration. The results are shown in Figs. 2 and S7.

| Samples                              | Ferrihydrite          | Goethite | Hematite | <i>R</i> -factor <sup>a</sup> |
|--------------------------------------|-----------------------|----------|----------|-------------------------------|
| $[\text{CO}_3]_0 = 0 \text{ mM}^b$   |                       |          |          |                               |
| 0d                                   | 1.00 (0) <sup>c</sup> | --       | --       | 0.012                         |
| 4d                                   | 0.43 (2)              | 0.52 (1) | 0.04 (1) | 0.006                         |
| 7d                                   | 0.12 (2)              | 0.81 (2) | 0.08 (1) | 0.008                         |
| 10d                                  | --                    | 0.91 (1) | 0.09 (1) | 0.008                         |
| 14d                                  | --                    | 0.90 (1) | 0.10 (1) | 0.009                         |
| 21d                                  | --                    | 0.90 (1) | 0.10 (1) | 0.009                         |
| $[\text{CO}_3]_0 = 11.42 \text{ mM}$ |                       |          |          |                               |
| 0d                                   | 1.00 (0)              | --       | --       | 0.013                         |
| 4d                                   | 0.59 (2)              | 0.14 (1) | 0.27 (0) | 0.005                         |
| 7d                                   | 0.39 (2)              | 0.18 (1) | 0.43 (1) | 0.004                         |
| 10d                                  | 0.29 (2)              | 0.19 (2) | 0.52 (1) | 0.006                         |
| 14d                                  | 0.24 (2)              | 0.20 (2) | 0.56 (1) | 0.006                         |
| 21d                                  | 0.20 (3)              | 0.21 (2) | 0.59 (1) | 0.007                         |
| $[\text{CO}_3]_0 = 80 \text{ mM}$    |                       |          |          |                               |
| 0d                                   | 1.00 (0)              | --       | --       | 0.016                         |
| 2d                                   | 0.78 (2)              | 0.14 (1) | 0.08 (0) | 0.006                         |
| 4d                                   | 0.61 (2)              | 0.19 (1) | 0.19 (0) | 0.005                         |
| 7d                                   | 0.44 (2)              | 0.23 (1) | 0.33 (1) | 0.005                         |
| 10d                                  | 0.32 (2)              | 0.28 (1) | 0.40 (1) | 0.004                         |
| 14d                                  | 0.25 (2)              | 0.29 (2) | 0.46 (1) | 0.005                         |
| 21d                                  | 0.21 (2)              | 0.29 (2) | 0.50 (1) | 0.006                         |
| $[\text{CO}_3]_0 = 180 \text{ mM}$   |                       |          |          |                               |
| 0d                                   | 1.00 (0)              | --       | --       | 0.012                         |

|                                                        |          |          |          |       |
|--------------------------------------------------------|----------|----------|----------|-------|
| 2d                                                     | 0.79 (2) | 0.17 (1) | 0.04 (0) | 0.007 |
| 4d                                                     | 0.60 (2) | 0.27 (1) | 0.13 (0) | 0.005 |
| 7d                                                     | 0.45 (2) | 0.33 (1) | 0.23 (0) | 0.004 |
| 10d                                                    | 0.30 (2) | 0.41 (1) | 0.29 (0) | 0.003 |
| 14d                                                    | 0.22 (2) | 0.45 (1) | 0.33 (1) | 0.004 |
| 21d                                                    | 0.14 (2) | 0.50 (1) | 0.36 (1) | 0.004 |
| [CO <sub>3</sub> ] <sub>0</sub> = 286 mM               |          |          |          |       |
| 0d                                                     | 1.00 (0) | --       | --       | 0.010 |
| 4d                                                     | 0.62 (2) | 0.27 (1) | 0.11 (0) | 0.005 |
| 7d                                                     | 0.46 (1) | 0.34 (1) | 0.20 (0) | 0.003 |
| 10d                                                    | 0.34 (2) | 0.41 (1) | 0.25 (0) | 0.004 |
| 14d                                                    | 0.25 (2) | 0.46 (1) | 0.29 (0) | 0.004 |
| 21d                                                    | 0.15 (2) | 0.52 (1) | 0.33 (1) | 0.004 |
| [NO <sub>3</sub> ] <sub>0</sub> = 0.32 mM <sup>d</sup> |          |          |          |       |
| 0d                                                     | 1.00 (0) | --       | --       | 0.015 |
| 2d                                                     | 0.67 (2) | 0.33 (1) | --       | 0.007 |
| 4d                                                     | 0.38 (2) | 0.57 (1) | 0.06 (0) | 0.006 |
| 7d                                                     | 0.10 (2) | 0.81 (2) | 0.09 (1) | 0.008 |
| 10d                                                    | --       | 0.90 (1) | 0.10 (1) | 0.008 |
| 14d                                                    | --       | 0.89 (1) | 0.11 (1) | 0.009 |
| 21d                                                    | --       | 0.89 (1) | 0.11 (1) | 0.009 |
| [NO <sub>3</sub> ] <sub>0</sub> = 268 mM               |          |          |          |       |
| 0d                                                     | 1.00 (0) | --       | --       | 0.011 |
| 2d                                                     | 0.68 (2) | 0.32 (1) | --       | 0.007 |
| 4d                                                     | 0.36 (2) | 0.59 (2) | 0.05 (1) | 0.007 |
| 7d                                                     | 0.06 (3) | 0.86 (2) | 0.07 (1) | 0.009 |
| 10d                                                    | --       | 0.93 (1) | 0.07 (1) | 0.009 |
| 14d                                                    | --       | 0.92 (1) | 0.08 (1) | 0.010 |
| 21d                                                    | --       | 0.91 (1) | 0.09 (1) | 0.011 |

---

- 21 <sup>a</sup> *R*-factor is an indicator of the goodness for the LCF of Fe K-edge EXAFS spectra.
- 22 <sup>b</sup> Carbonate is abbreviated as CO<sub>3</sub>.
- 23 <sup>c</sup> Standard errors of the LCF of Fe K-edge EXAFS spectra are included in the parentheses.
- 24 <sup>d</sup> Nitrate is abbreviated as NO<sub>3</sub>.

25 **Table S2.** First-order reaction rate constant ( $k_{\text{obs}}$ ) for ferrihydrite transformation, goethite  
 26 formation, and hematite formation in the presence of carbonate ( $\text{CO}_3$ ) within 10d. The results  
 27 are shown in Fig. 3.

| System                               | Ferrihydrite                         |       | Goethite                             |       | Hematite                             |       |
|--------------------------------------|--------------------------------------|-------|--------------------------------------|-------|--------------------------------------|-------|
|                                      | $k_{\text{obs}}$ ( $\text{d}^{-1}$ ) | $R^2$ | $k_{\text{obs}}$ ( $\text{d}^{-1}$ ) | $R^2$ | $k_{\text{obs}}$ ( $\text{d}^{-1}$ ) | $R^2$ |
| $[\text{CO}_3]_0 = 0 \text{ mM}$     | $0.259 \pm 0.034$                    | 0.978 | $0.213 \pm 0.016$                    | 0.990 | $0.010 \pm 0.001$                    | 0.966 |
| $[\text{CO}_3]_0 = 11.42 \text{ mM}$ | $0.130 \pm 0.003$                    | 0.998 | $0.025 \pm 0.003$                    | 0.855 | $0.077 \pm 0.002$                    | 0.997 |
| $[\text{CO}_3]_0 = 80 \text{ mM}$    | $0.118 \pm 0.002$                    | 0.998 | $0.038 \pm 0.005$                    | 0.822 | $0.053 \pm 0.002$                    | 0.991 |
| $[\text{CO}_3]_0 = 180 \text{ mM}$   | $0.120 \pm 0.003$                    | 0.998 | $0.060 \pm 0.006$                    | 0.917 | $0.035 \pm 0.002$                    | 0.984 |
| $[\text{CO}_3]_0 = 286 \text{ mM}$   | $0.112 \pm 0.003$                    | 0.998 | $0.059 \pm 0.005$                    | 0.950 | $0.030 \pm 0.001$                    | 0.994 |

28

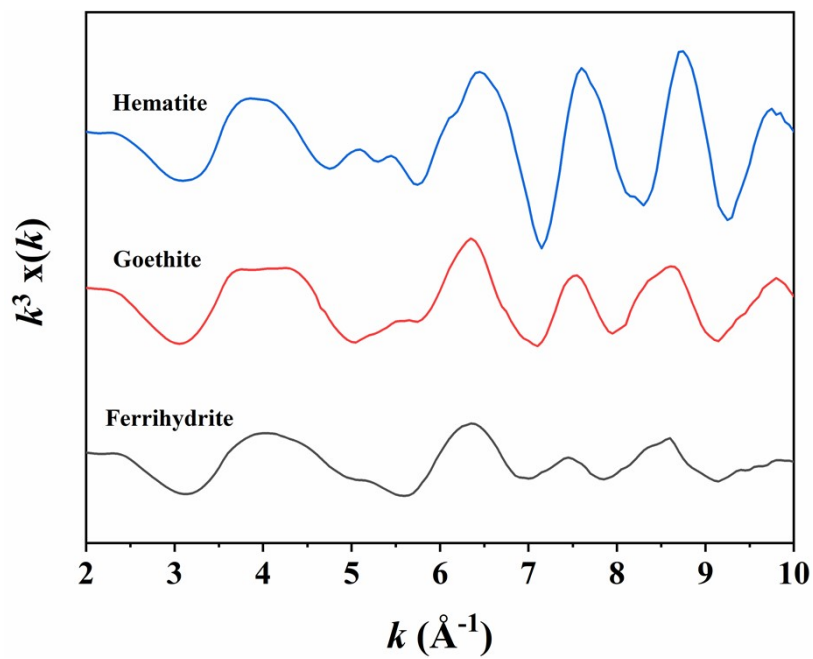

29

30 **Fig. S1.** XAS spectra of references (ferrihydrite, goethite, and hematite) used in LCF analysis  
31 of transformation samples.

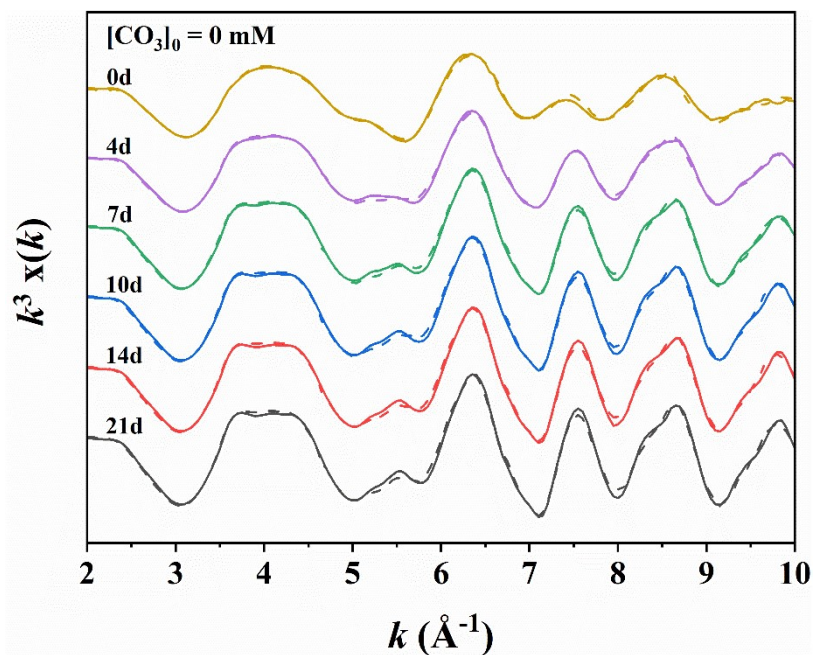

32

33 **Fig. S2.** Linear combination fitting (LCF) of Fe K-edge EXAFS spectra of ferrihydrite as a  
 34 function of aging time at carbonate concentration ( $[\text{CO}_3]_0$ ) of 0 mM. Solid lines and dashed  
 35 lines represent the normalized  $k^3$  weighted EXAFS spectra and their LC fits, respectively ( $k$   
 36 range for modeling = 2-10  $\text{\AA}^{-1}$ ).

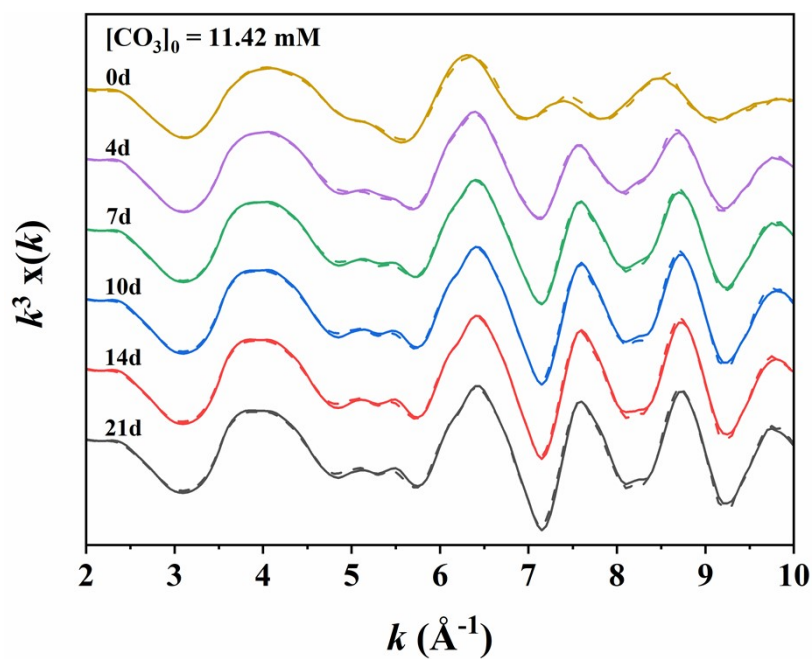

37

38 **Fig. S3.** Linear combination fitting (LCF) of Fe K-edge EXAFS spectra of ferrihydrite as a  
 39 function of aging time at carbonate concentration ( $[\text{CO}_3]_0$ ) of 11.42 mM. Solid lines and dashed  
 40 lines represent the normalized  $k^3$  weighted EXAFS spectra and their LC fits, respectively ( $k$   
 41 range for modeling = 2-10  $\text{\AA}^{-1}$ ).



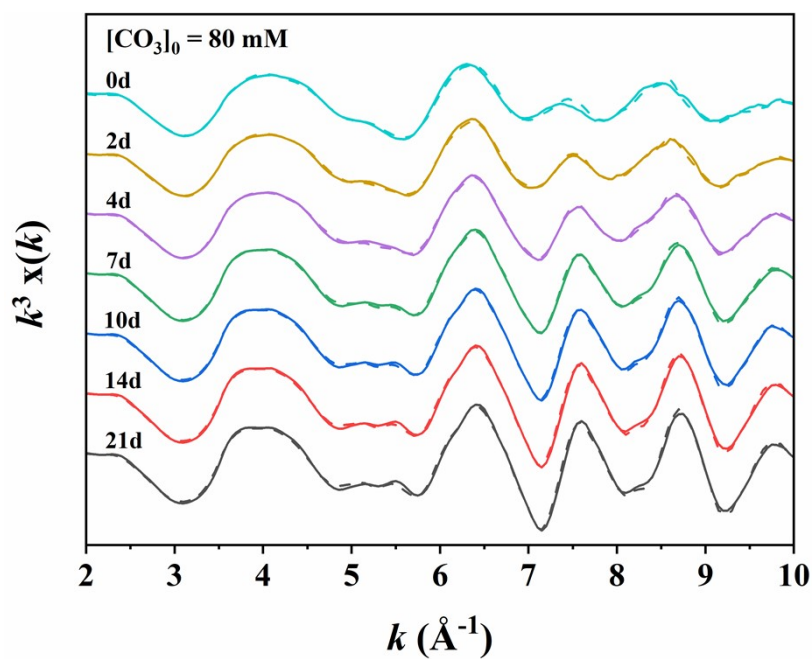

42

43 **Fig. S4.** Linear combination fitting (LCF) of Fe K-edge EXAFS spectra of ferrihydrite as a  
 44 function of aging time at carbonate concentration ( $[\text{CO}_3]_0$ ) of 80 mM. Solid lines and dashed  
 45 lines represent the normalized  $k^3$  weighted EXAFS spectra and their LC fits, respectively ( $k$   
 46 range for modeling = 2-10  $\text{\AA}^{-1}$ ).

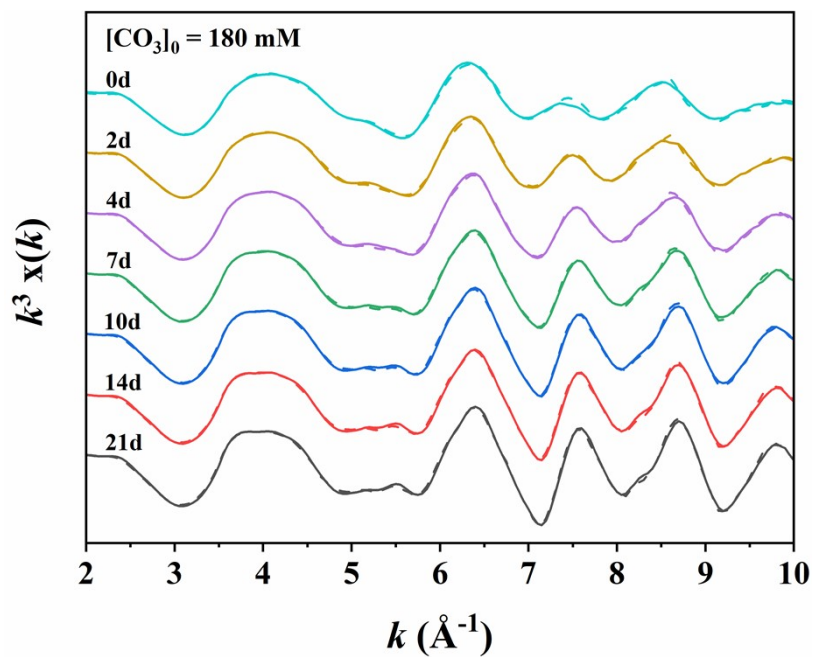

47

48 **Fig. S5.** Linear combination fitting (LCF) of Fe K-edge EXAFS spectra of ferrihydrite as a  
 49 function of aging time at carbonate concentration ( $[\text{CO}_3]_0$ ) of 180 mM. Solid lines and dashed  
 50 lines represent the normalized  $k^3$  weighted EXAFS spectra and their LC fits, respectively ( $k$   
 51 range for modeling = 2-10  $\text{\AA}^{-1}$ ).

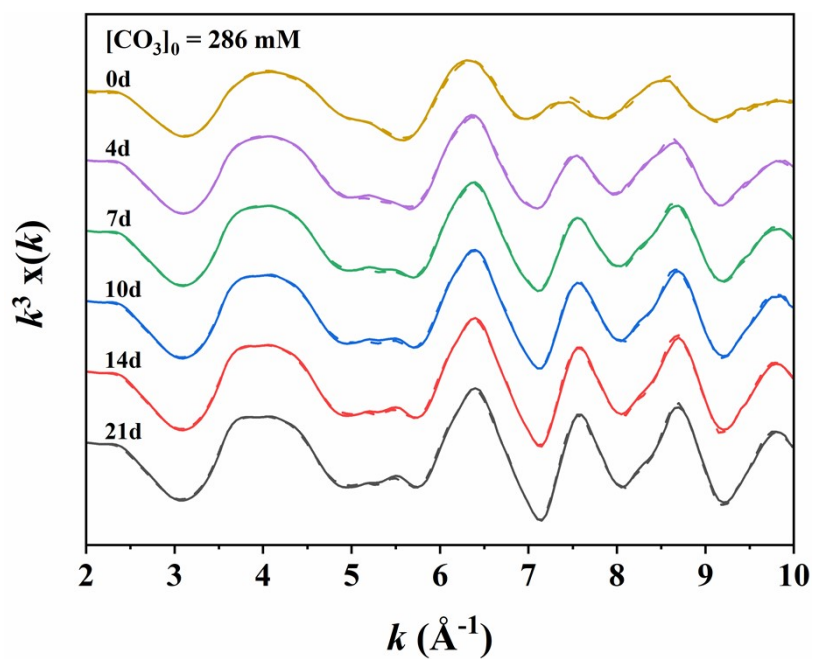

52

53 **Fig. S6.** Linear combination fitting (LCF) of Fe K-edge EXAFS spectra of ferrihydrite as a  
 54 function of aging time at carbonate concentration ( $[\text{CO}_3]_0$ ) of 286 mM. Solid lines and dashed  
 55 lines represent the normalized  $k^3$  weighted EXAFS spectra and their LC fits, respectively ( $k$   
 56 range for modeling = 2-10  $\text{\AA}^{-1}$ ).

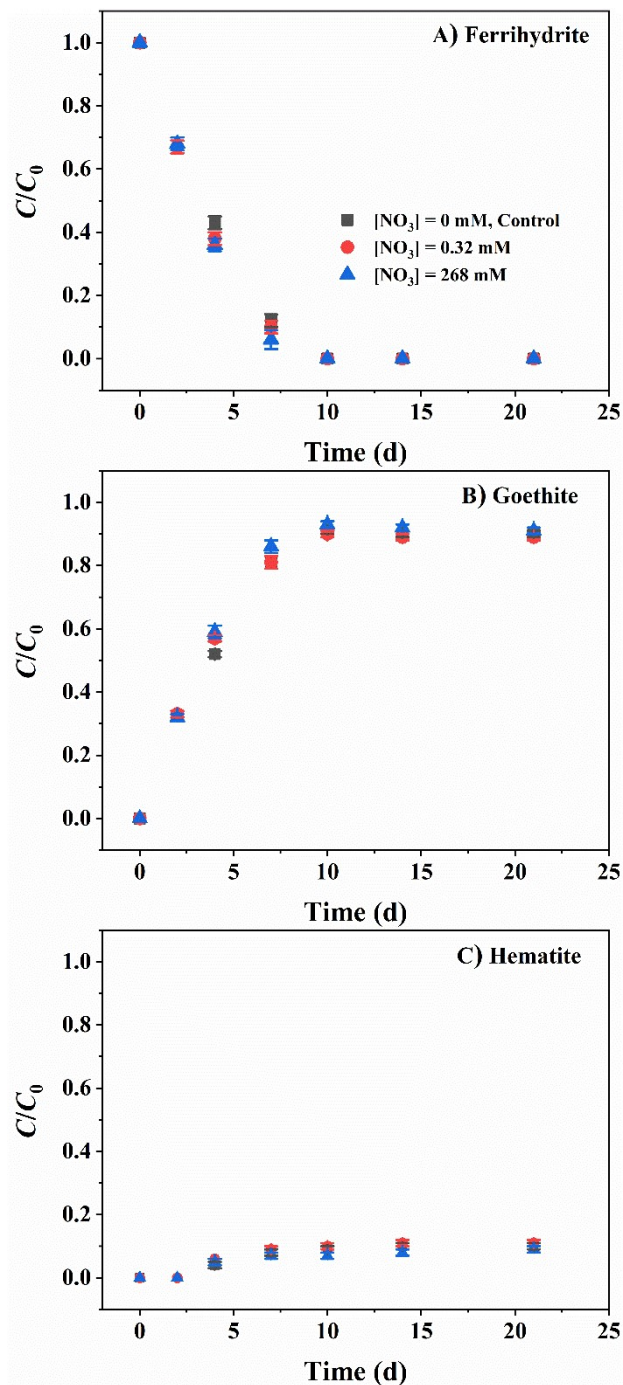

57

58 **Fig. S7.** Effects of nitrate concentration on A) ferrihydrite transformation, B) goethite  
 59 formation, and C) hematite formation at pH 10.  $C_0$  is the percent ferrihydrite before phase  
 60 transformation (100%), and  $C$  is the relative amount of iron (oxyhydr)oxides remaining or  
 61 generating at aging time  $t$  (d) calculated using the LCF of Fe K-edge EXAFS spectra. Nitrate  
 62 is abbreviated as  $\text{NO}_3$ . Meaning of symbols in panels B) and C) are the same with panel A).

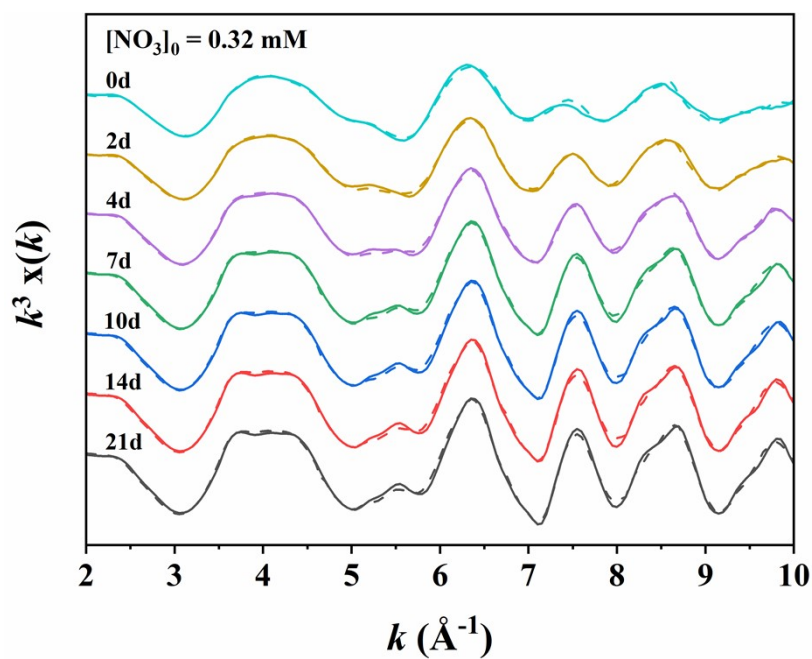

63

64 **Fig. S8.** Linear combination fitting (LCF) of Fe K-edge EXAFS spectra of ferrihydrite as a  
 65 function of aging time at nitrate concentration ( $[\text{NO}_3]_0$ ) of 0.32 mM. Solid lines and dashed  
 66 lines represent the normalized  $k^3$  weighted EXAFS spectra and their LC fits, respectively ( $k$   
 67 range for modeling = 2-10  $\text{\AA}^{-1}$ ).

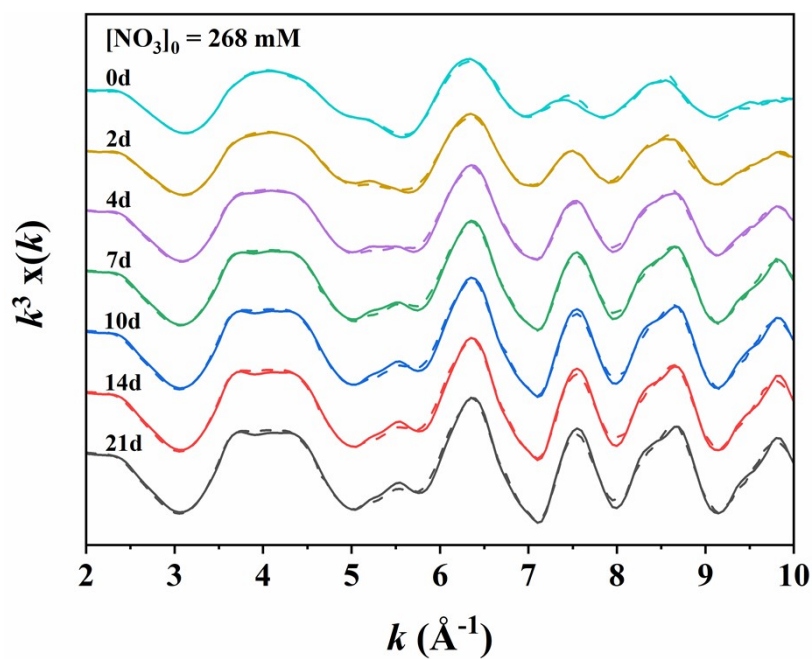

68

69 **Fig. S9.** Linear combination fitting (LCF) of Fe K-edge EXAFS spectra of ferrihydrite as a  
 70 function of aging time at nitrate concentration ( $[\text{NO}_3]_0$ ) of 268 mM. Solid lines and dashed  
 71 lines represent the normalized  $k^3$  weighted EXAFS spectra and their LC fits, respectively ( $k$   
 72 range for modeling = 2-10  $\text{Å}^{-1}$ ).

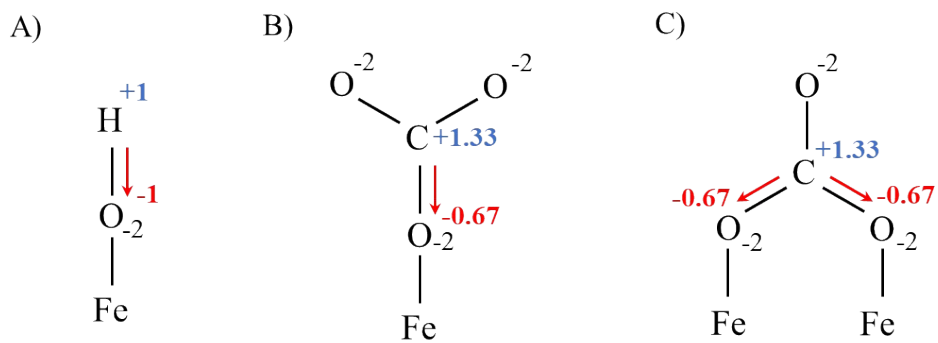

73

74 **Fig. S10.** Schematic diagram of charge sharing by a  $H^+$  atom or a  $C^{4+}$  atom by oxygen in A) a  
 75 hydroxyl ion and B) a carbonate ion. A bidentate binuclear surface species of carbonate is  
 76 shown in C). Shared charge of the central atom (H or C) is shown in blue. The effective negative  
 77 charge residing on an O atom is shown in red.
